# Supplementary material for: Skeletal glucocorticoid signalling determines leptin resistance and obesity in aging mice
Source: PubMed Central journal article supplement — Mol Metab. 2020 Oct 10;42:101098. doi: 10.1016/j.molmet.2020.101098 (PMC7596342; doi:10.1016/j.molmet.2020.101098), 2020-10-10
Supplement: mmc1.pdf [file mmc1.pdf]

**Supplemental Table 1 for Henneicke H *et al.* Differentially-regulated canonical pathways in bones from wild-type and HSD2<sup>OB</sup>-tg mice at 3, 6, 12 and 18 months of age.** Canonical pathways with only one gene differentially expressed were excluded from analysis. z-scores indicate directionality of change, with positive being overexpressed in HSD2<sup>OB</sup>-tg mice, negative being down-regulated in HSD2<sup>OB</sup>-tg mice. *p*-values relate to the degree of overlap between all of the genes in the pathway and the number of genes identified as differentially expressed, assessed by a one-sided Fischer's exact test. Only canonical pathways with a *p*<0.05 were considered.

| Timepoint                                  | Pathway                                           | Genes, with direction of change indicated                                                                                                   | z-score       | Overlap (%) | <i>p</i> -value |
|--------------------------------------------|---------------------------------------------------|---------------------------------------------------------------------------------------------------------------------------------------------|---------------|-------------|-----------------|
| 3 months                                   | Triacylglycerol Biosynthesis                      | ↓DGAT2L6, ↑GPAT3, ↓PLPPR3, ↑PLPPR4, ↑TAZ                                                                                                    | 0.447         | 5/44 (11%)  | 0.0144          |
|                                            | Ceramide Biosynthesis                             | ↑KDSR, ↓SPTSSB                                                                                                                              | N/A           | 2/7 (29%)   | 0.0204          |
|                                            | Mineralocorticoid Biosynthesis                    | ↓CYP11B1, ↑Hsd3b4 (includes others)                                                                                                         | N/A           | 2/8 (25%)   | 0.0266          |
|                                            | Glucocorticoid Biosynthesis                       | ↓CYP11B1, ↑Hsd3b4 (includes others)                                                                                                         | N/A           | 2/9 (22%)   | 0.0334          |
|                                            | Neuropathic Pain Signaling In Dorsal Horn Neurons | ↑ELK1, ↑FRS2, ↑GPR37, ↑GRIN2A, ↑GRM1, ↓PLCH1, ↓PTPN11, ↓TACR1                                                                               | 0.707         | 8/115 (7%)  | 0.0363          |
|                                            | Ketogenesis                                       | ↓BDH1, ↑HMGCS1                                                                                                                              | N/A           | 2/10 (20%)  | 0.0409          |
|                                            | 6 months                                          | Coenzyme A Biosynthesis                                                                                                                     | ↑COASY, ↓PPCS | N/A         | 2/3 (67%)       |
| Inflammasome pathway                       |                                                   | ↑IL1B, ↑NLRP1, ↑NOD2                                                                                                                        | N/A           | 3/19 (16%)  | 0.0356          |
| Maturity Onset Diabetes of Young Signaling |                                                   | ↑INS, ↑INSR, ↓PDX1                                                                                                                          | N/A           | 3/21 (14%)  | 0.0461          |
| 12 months                                  | LPS/IL-1 mediated inhibition of RXR function      | ↓ABCG8, ↑ACSBG1, ↓ALDH18A1, ↑CD14, ↑CYP2C8, ↑Cyp4a14, ↑FABP6, ↓HMGCS1, ↓HS6ST2, ↑IL1RN, ↑LBP, ↑MYD88, ↑PPARA, ↑SULT2A1, ↓SULT2B1, ↑TNFRSF1B | 0.707         | 16/204 (8%) | 0.0065          |
|                                            | Nucleotide Excision Repair Pathway                | ↓GTF2H1, ↓GTF2H4, ↓POLR2L, ↓RAD23B, ↓RPA1                                                                                                   | N/A           | 5/33 (15%)  | 0.0086          |

|           |                                                            |                                                                                                  |        |             |        |
|-----------|------------------------------------------------------------|--------------------------------------------------------------------------------------------------|--------|-------------|--------|
|           | DNA Double-Strand Break Repair by Homologous Recombination | ↓MRE11, ↓RAD50, ↓RPA1                                                                            | N/A    | 3/14 (21%)  | 0.0157 |
|           | Communication between Innate and Adaptive Immune Cells     | ↑Ccl9, ↓HLA-A, ↑IGHG1, ↑Ighg2b, ↑IL1RN, ↓Tlr11, ↑Tlr13                                           | N/A    | 7/74 (9%)   | 0.0253 |
|           | TNFR2 Signaling                                            | ↓BIRC2, ↓Naip1 (includes others), ↓TBK1, ↑TNFRSF1B                                               | 1.000  | 4/30 (13%)  | 0.0282 |
|           | Sucrose Degradation V (Mammalian)                          | ↑ALDOB, ↑GALM                                                                                    | N/A    | 2/8 (25%)   | 0.0365 |
|           | Assembly of RNA Polymerase II Complex                      | ↓GTF2E1, ↓GTF2H1, ↓GTF2H4, ↓POLR2L, ↓TAF1                                                        | N/A    | 5/48 (10%)  | 0.0385 |
|           | Citrulline Biosynthesis                                    | ↓ALDH18A1, ↑ARG1                                                                                 | N/A    | 2/9 (22%)   | 0.0457 |
| 18 months | Galactose degradation I (Leloir pathway)                   | ↑GALK2, ↑GALM                                                                                    | N/A    | 2/5 (40%)   | 0.0140 |
|           | SPINK1 pancreatic cancer pathway                           | ↓CPM, ↓ELANE, ↓F2RL1, ↓KLK3, ↓KLK8, ↓Prss (includes others)                                      | 1.633  | 6/54 (11%)  | 0.0180 |
|           | MSP/RON signalling pathway                                 | ↑ACTG1, ↑ITGAM, ↓KLK3, ↓KLK8, ↓PIK3C2B, ↓PIK3R1                                                  | N/A    | 6/56 (11%)  | 0.0212 |
|           | B cell development                                         | ↓CD19, ↓CD79A, ↓CD79B, ↓HLA-DMB                                                                  | N/A    | 4/28 (0.14) | 0.0221 |
|           | Chondroitin Sulfate Degradation (Metazoa)                  | ↑Chi3/Chi4, ↑GALNS, ↑HEXD                                                                        | N/A    | 3/16 (19%)  | 0.0225 |
|           | LXR/RXR activation                                         | ↑ABCG8, ↑APOA4, ↑ARG2, ↓C4A/C4B, ↑IL1B, ↑IL1RL2, ↑MSR1, ↓NFKB2, ↓NR1H3                           | -0.378 | 9/110 (8%)  | 0.0277 |
|           | IL-23 Signaling Pathway                                    | ↑IL1B, ↓IL23R, ↓NFKB2, ↓PIK3C2B, ↓PIK3R1                                                         | -1.342 | 5/45 (11%)  | 0.0298 |
|           | Sucrose Degradation V (Mammalian)                          | ↑GALM, ↑KHK                                                                                      | N/A    | 2/8 (25%)   | 0.0362 |
|           | Hepatic cholestasis                                        | ↑ABCG8, ↓FABP6, ↑IL1B, ↑IL1RL2, ↑IL31, ↑IRAK3, ↑IRAK4, ↓NFKB2, ↓NR1H3, ↓PRKCE, ↓SLC22A6, ↓TNFSF8 |        | 12/173 (7%) |        |

B cell receptor signaling

↓ABL1, ↓CD19, ↓CD79A, ↓CD79B, ↓FOXO1, ↑INPP5J,  
↓MAP3K6, ↑MAPK13, ↓NFKB2, ↓PAX5, ↓PIK3C2B,  
↓PIK3R1

-2.111

12/176 (7%)

0.0426

**Supplemental Table 2. Upstream regulators of differential gene (DE) expression at 3, 6, 12 and 18 months.** DE genes were analysed using IPA to determine potential upstream regulators of gene expression at each timepoint. The table lists all potential upstream regulators with a z-score either greater than +2 (indicating activation) and less than -2 (indicating inhibition). *p*-values are calculated based upon overlap between the number of DE genes and the total number of genes in the pathway, significance is calculated using a one-sided Fisher's exact test.

| Timepoint | Factor | Function                          | Genes regulated by the factor, and their direction             | z-score | p-value |
|-----------|--------|-----------------------------------|----------------------------------------------------------------|---------|---------|
| 3 months  | AGO2   | translation regulator             | ↓let-7, ↓mir-130, ↓mir-154, ↓mir-467, ↓mir-489                 | -2.194  | 0.19    |
|           | NR1H3  | ligand-dependent nuclear receptor | ↑ATF3, ↓CYP7A1, ↓CYTH1, ↑DIO2, ↑MFGE8, ↑PTGS2                  | -2.172  | 1       |
|           | ZBTB16 | transcription regulator           | ↑CD200R1, ↓DTX1, ↑PTGS2, ↓RARG                                 | -2      | 0.472   |
|           | TLR4   | transmembrane receptor            | ↑ATF3, ↑CD200R1, ↓NAA80, ↓ORMDL3, ↑PTGS2, ↓SCARB1              | 2.164   | 1       |
| 6 months  | SRF    | transcription regulator           | ↓GATA4, ↑GFI1, ↑MGST2, ↓mir-133, ↑MOGAT2, ↑MS4A3, ↓MYOCD, ↑Ngp | -2.8    | 0.265   |
|           | MRTFB  | transcription regulator           | ↑GFI1, ↑MGST2, ↑MOGAT2, ↑MS4A3, ↑Ngp                           | -2.236  | 0.198   |
|           | MRTFA  | transcription regulator           | ↑GFI1, ↑MGST2, ↑MOGAT2, ↑MS4A3, ↑Ngp                           | -2.236  | 0.275   |
|           | Creb   | group                             | ↓IFI16, ↑mir-124, ↓mir-9, ↑PLIN3, ↑SYNPO                       | -2.219  | 1       |
|           | GATA1  | transcription regulator           | ↑HPSE, ↓IKZF4, ↓PECAM1, ↓POU4F1, ↓ZNF496                       | -2      | 1       |
|           | P2RY14 | G-protein coupled receptor        | ↑MAFA, ↑PDE1C, ↓RASL10B, ↑SSTR1                                | 2       | 0.0201  |

|           |         |                         |                                                                          |        |        |
|-----------|---------|-------------------------|--------------------------------------------------------------------------|--------|--------|
| 12 months | MYD88   | other                   | ↑ACPP, ↓AK3, ↑CCL4, ↑CEBPD, ↑IFNA4, ↑IL1B, ↑INHBA, ↑NOD2                 | 2.116  | 1      |
|           | PTPRJ   | phosphatase             | ↑ACPP, ↑CCL4, ↑CEBPD, ↑FGL2, ↑INHBA                                      | 2.236  | 0.0267 |
|           | SASH1   | other                   | ↑ACPP, ↑CCL4, ↑FGL2, ↑HHEX, ↑INHBA                                       | 2.236  | 0.13   |
|           | NOS2    | enzyme                  | ↑CCL4, ↑GSPT2, ↑IL1B, ↑KRT13, ↑Orm1 (includes others), ↑PLSCR1           | 2.236  | 0.547  |
|           | STAT1   | transcription regulator | ↑ARG1, ↓BATF2, ↓Cxcl11, ↑CYP2C8, ↓IFIT3, ↓PSMB10, ↓TAPBPL                | -2.401 | 0.47   |
|           | EGFR    | kinase                  | ↑ARG1, ↓HNRNPD, ↓KPNB1, ↓TIMM10, ↓XRN2                                   | -2.233 | 0.433  |
|           | MRTFB   | transcription regulator | ↑DMKN, ↑GFI1, ↓HLA-A, ↑PRG3, ↑SLPI                                       | -2     | 0.208  |
|           | MRTFA   | transcription regulator | ↑DMKN, ↑GFI1, ↓HLA-A, ↑PRG3, ↑SLPI                                       | -2     | 0.288  |
|           | LHX1    | transcription regulator | ↑ALDOB, ↑CLTRN, ↓HHEX, ↑SLC22A24, ↑SLC34A1, ↑SOSTDC1, ↑SPP2,<br>↑UGT2B28 | 2      | 0.0474 |
|           | mir-223 | microRNA                | ↑C5AR1, ↑IL1RN, ↓MLKL, ↑Tlr13                                            | 2      | 1      |
|           | IKZF1   | transcription regulator | ↓Grifin, ↓PPP1R9A, ↓PRRT3, ↑SLPI                                         | 2      | 0.556  |
|           | TCF7L2  | transcription regulator | ↑BACE1, ↑CREB5, ↑CYP2C8, ↓EPS15, ↓Gcg, ↑MOG, ↑PIM3, ↑PLEKHH1,<br>↑SMCO3  | 2.121  | 1      |
|           | PTTG1   | transcription regulator | ↓MBD4, ↓RAD50, ↓SUMO1, ↓TLK1, ↓XRN2                                      | 2.219  | 0.0899 |
|           | PRDM1   | transcription regulator | ↓CABP5, ↑Gm14685 (includes others), ↑IGHG1, ↑JCHAIN, ↑TRIM65             | 2.236  | 0.251  |

|           |          |                            |                                                                                                                                                   |        |          |
|-----------|----------|----------------------------|---------------------------------------------------------------------------------------------------------------------------------------------------|--------|----------|
| 18 months | MRTFA    | transcription regulator    | ↑CTSG, ↑DMKN, ↑ELANE, ↑FABP3, ↑GFI1, ↑LILRB4, ↑MAPK13, ↑MS4A3, ↑Ngp, ↑PGLYRP1, ↑PRSS57, ↑PRTN3                                                    | -3.317 | 0.000214 |
|           | MRTFB    | transcription regulator    | ↑CTSG, ↑DMKN, ↑ELANE, ↑GFI1, ↑LILRB4, ↑MAPK13, ↑MS4A3, ↑Ngp, ↑PGLYRP1, ↑PRSS57, ↑PRTN3                                                            | -3.162 | 0.000276 |
|           | SRF      | transcription regulator    | ↑ACTG1, ↓CD19, ↑CTSG, ↑DMKN, ↑ELANE, ↑GFI1, ↑ITGAM, ↑MAPK13, ↑MS4A3, ↑Ngp, ↑PGLYRP1, ↑PRSS57, ↑PRTN3, ↑TBXT                                       | -3.051 | 0.00353  |
|           | ZEB2     | transcription regulator    | ↑CTSG, ↑ELANE, ↑GATM, ↑LTA4H, ↑MPO, ↑MS4A3, ↑PRTN3                                                                                                | -2.646 | 0.000364 |
|           | IL10RA   | transmembrane receptor     | ↑ARG2, ↑CLEC12A, ↑CLEC4E, ↑CLEC5A, ↑CST7, ↑ERO1A, ↑F13A1, ↑IL1B, ↓KLK3, ↓Nnt, ↓NR1H3, ↑OLR1, ↓SLC7A11, ↓Speer4a (includes others), ↑TARM1, ↓TTLL6 | -2.523 | 0.101    |
|           | ADAMTS12 | peptidase                  | ↑CHI3L1, ↑Chil3/Chil4, ↑CLEC4E, ↑HDC, ↑S100A6                                                                                                     | -2.219 | 0.00225  |
|           | NCSTN    | peptidase                  | ↑CD84, ↑CTSG, ↑ELANE, ↑MPO                                                                                                                        | -2     | 0.0358   |
|           | INSIG1   | other                      | ↑ALOX5AP, ↑CLEC4E, ↑OLR1, ↑RAB27A                                                                                                                 | -2     | 0.477    |
|           | LTB4R    | G-protein coupled receptor | ↑CLEC10A, ↓mir-10, ↓mir-146, ↓NR1H3                                                                                                               | -2     | 0.0141   |
|           | Hbb-b2   | other                      | ↑CALCB, ↑CD44, ↑IL1B, ↑ITGAM                                                                                                                      | 2      | 0.0977   |
|           | CREB1    | transcription regulator    | ↑Chil3/Chil4, ↓CYP46A1, ↑ENTPD1, ↑NFIL3, ↑PDXK, ↑SPTY2D1                                                                                          | 2.2    | 0.0891   |

|        |                            |                                                                                                                                             |       |        |
|--------|----------------------------|---------------------------------------------------------------------------------------------------------------------------------------------|-------|--------|
| HOXA10 | transcription regulator    | ↓ADIPOQ, ↑G6pd2, ↑GFI1, ↓Gstt1, ↓PIK3R1                                                                                                     | 2.236 | 0.305  |
| Hbb-b1 | transporter                | ↑CALCB, ↑CD44, ↑IL1B, ↑ITGAM, ↑SURF1                                                                                                        | 2.236 | 0.282  |
| TCF7L2 | transcription regulator    | ↑CERS2, ↑DEGS1, ↑GJC2, ↓Gm11237 (includes others),<br>↑KLHL2, ↑LTV1, ↑RHOG, ↑SMIM15, ↑STRN                                                  | 2.333 | 1      |
| CCR2   | G-protein coupled receptor | ↓ADIPOQ, ↑Ccl6, ↑Chi3/Chi4, ↑F13A1, ↑IL1B, ↑THBS1, ↑VCAN                                                                                    | 2.377 | 0.0916 |
| IL4    | cytokine                   | ↑ACTG1, ↑ANXA2, ↓CD2, ↑CD44, ↑Chi3/Chi4, ↑CLEC10A, ↑CLTC,<br>↑CST7, ↓EPHX1, ↓GATA3, ↑GATM, ↑IL1B, ↑NFIL3, ↑PLSCR1, ↑RIN1,<br>↑TYRO3, ↑UGGT1 | 2.51  | 0.345  |
